# Supplementary material for: CCL17 blockade as a therapy for osteoarthritis pain and disease
Source: Springer Nature journal article supplement (doi:10.1186/s13075-018-1560-9), 2018-04-05

A

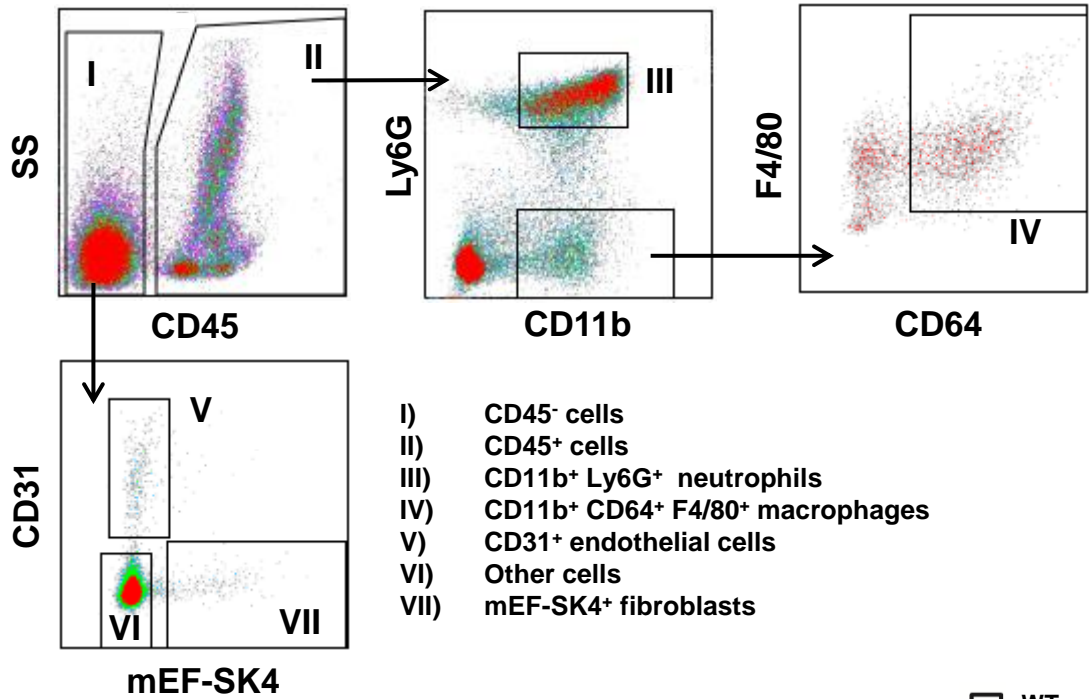

B

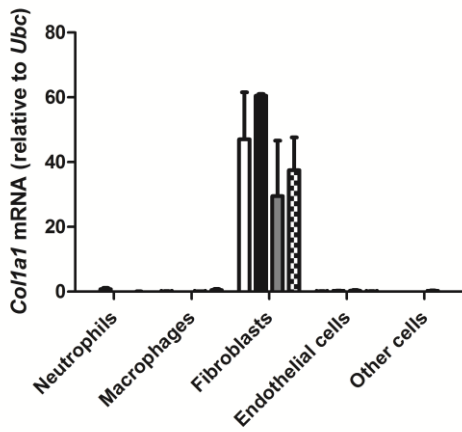

C

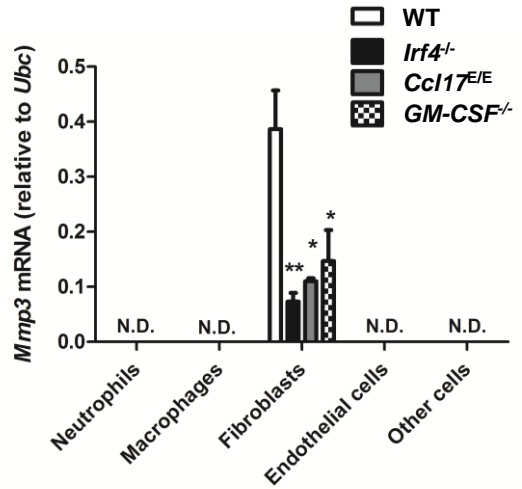

D

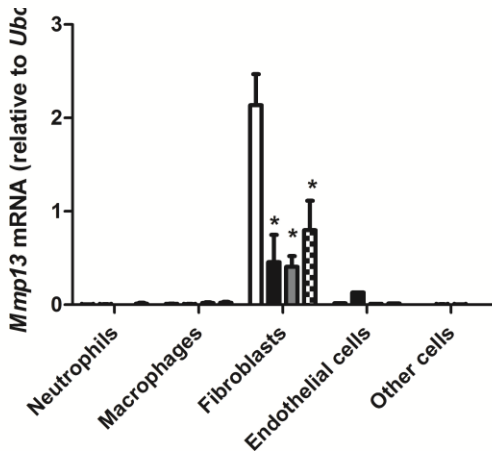

Supplement: MOESM1 [file 15593886]
