# Supplementary material for: CCL17 blockade as a therapy for osteoarthritis pain and disease
Source: Springer Nature journal article supplement (doi:10.1186/s13075-018-1560-9), 2018-04-05
Supplement: MOESM2 [file 15593886]

Proportions of synovial cell populations in CiOA knee joints at day 7.

|                                | WT         | <i>Irf4</i> <sup>-/-</sup> | <i>Ccl17</i> <sup>E/E</sup> | <i>GM-CSF</i> <sup>-/-</sup> |
|--------------------------------|------------|----------------------------|-----------------------------|------------------------------|
| Neutrophils <sup>1</sup>       | 35.9 (2.5) | 19.1 (1.4)*                | 42.7 (5.2)                  | 22.8 (2.9)*                  |
| Macrophages <sup>1</sup>       | 6.4 (0.3)  | 7.8 (0.6)                  | 9.8 (2.3)                   | 8.0 (1.0)                    |
| Fibroblasts <sup>2</sup>       | 1.3 (0.2)  | 2.0 (0.2)                  | 1.7 (0.2)                   | 1.6 (0.4)                    |
| Endothelial cells <sup>2</sup> | 2.6 (0.6)  | 3.1 (0.3)                  | 3.4 (0.2)                   | 3.1 (1.3)                    |
| Other cells <sup>2</sup>       | 95.7 (0.9) | 94.3 (0.1)                 | 94.1 (0.6)                  | 94.9 (1.8)                   |

Data expressed as percentage (SEM)

<sup>1</sup> Percentage of CD45<sup>+</sup> cells

<sup>2</sup> Percentage of CD45<sup>-</sup> cells

\*  $p < 0.05$ , WT vs. *Irf4*<sup>-/-</sup> or *GM-CSF*<sup>-/-</sup> mice
